# Supplementary material
Source: PubMed Central journal article supplement (PMC5334184)

# Supplementary Figure S1

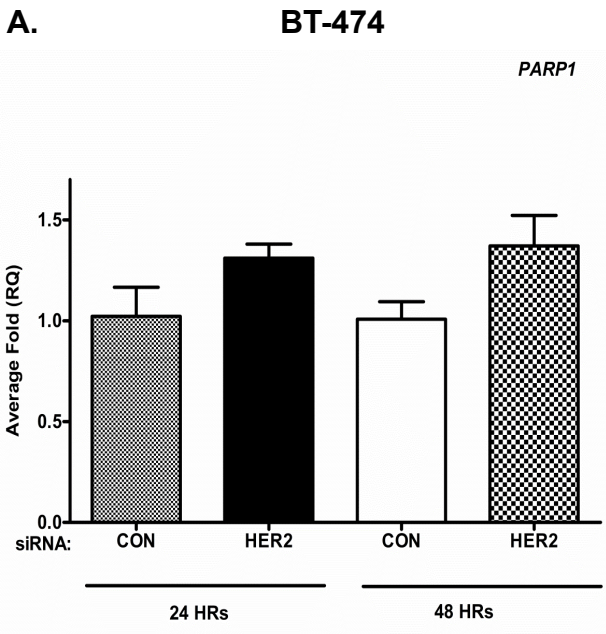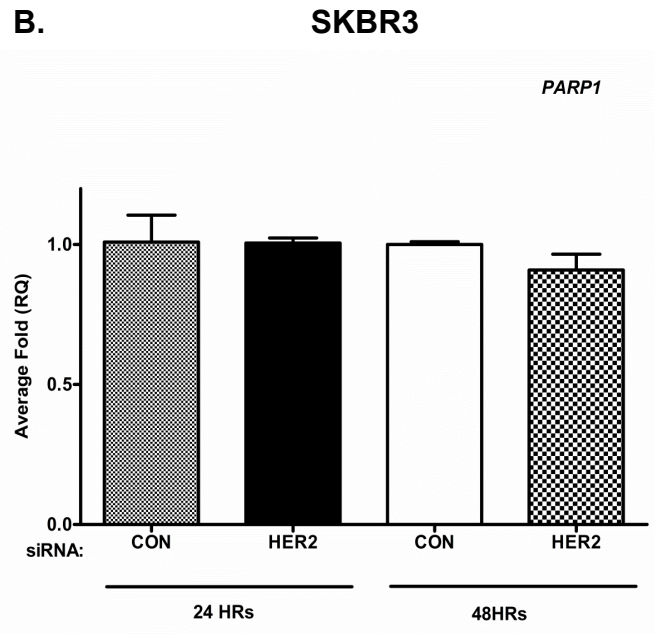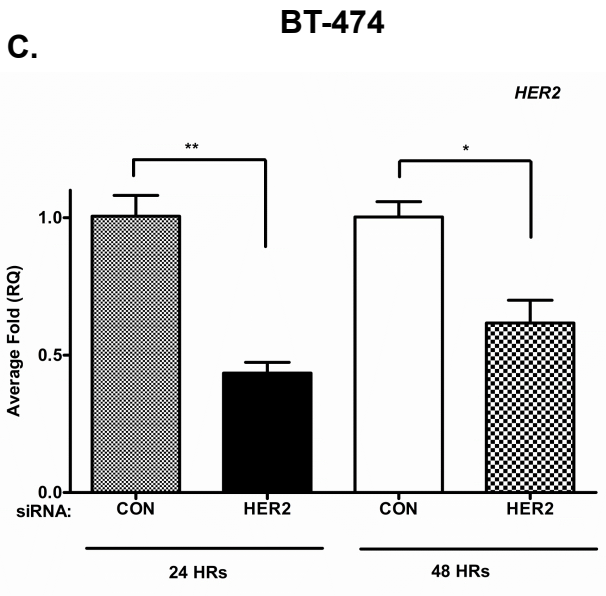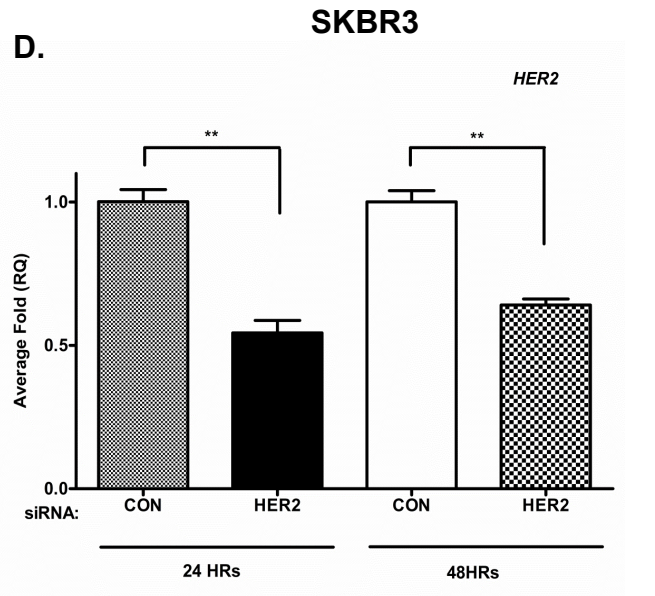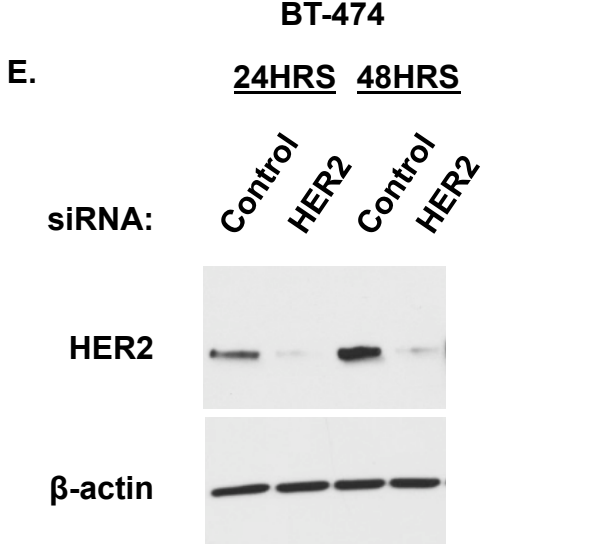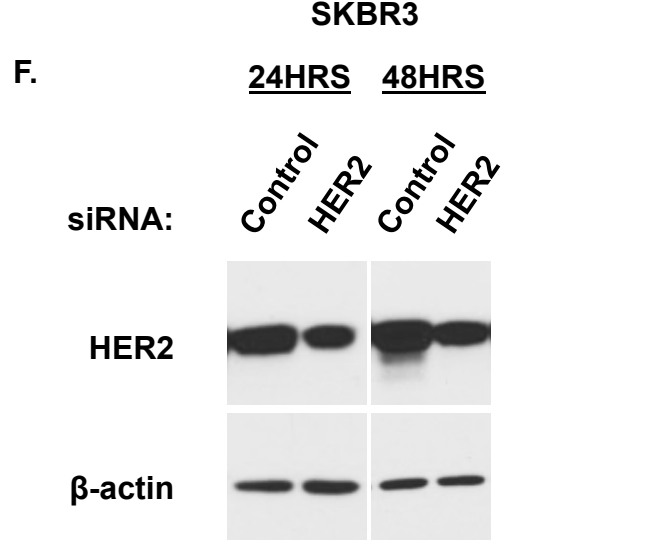

Supplement: NIHMS839403-supplement-2.pdf [file NIHMS839403-supplement-2.pdf]

# Supplemental Figure S2

**A.** **BT-474**

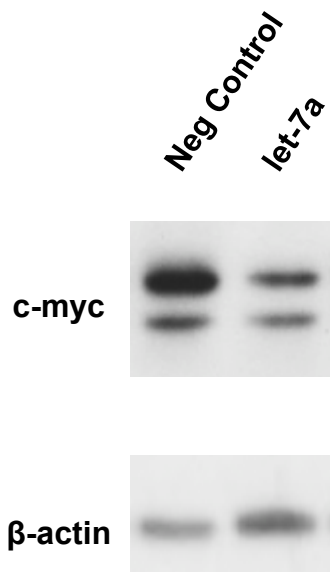

**B.** **MCF7**

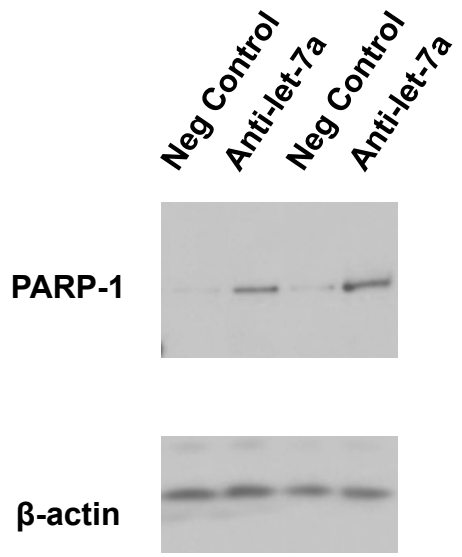

Supplement: NIHMS839403-supplement-3.pdf [file NIHMS839403-supplement-3.pdf]
